# Supplementary material for: Unveiling the synergy: a combined experimental and theoretical study of β-cyclodextrin with melatonin
Source: Royal Society of Chemistry journal article supplement (doi:10.1039/d3tb02795c), 2024-01-01
Supplement: d3tb02795c1.pdf [file d3tb02795c1.pdf]

# Supplementary Material

## Unveiling the Synergy: A Combined Experimental and Theoretical Study of $\beta$ -Cyclodextrin with Melatonin

**Riccardo Ferrero,<sup>§</sup> Stefano Pantaleone,<sup>§</sup> Cecilia Irene Gho,<sup>‡</sup> Gjylije Hoti, Francesco Trotta, Valentina Brunella,\* Marta Corno\***

Dipartimento di Chimica and Nanostructured Interfaces and Surfaces (NIS) Centre, Università degli Studi di Torino, Via P. Giuria 7, 10125 Torino, Italy

<sup>‡</sup>Present address: Dipartimento di Scienza Applicata e Tecnologia, Politecnico di Torino, C.so Duca degli Abruzzi 24, 10129 Torino, Italy

<sup>§</sup>The authors equally contributed

\*Correspondence: [valentina.brunella@unito.it](mailto:valentina.brunella@unito.it), [marta.corno@unito.it](mailto:marta.corno@unito.it)

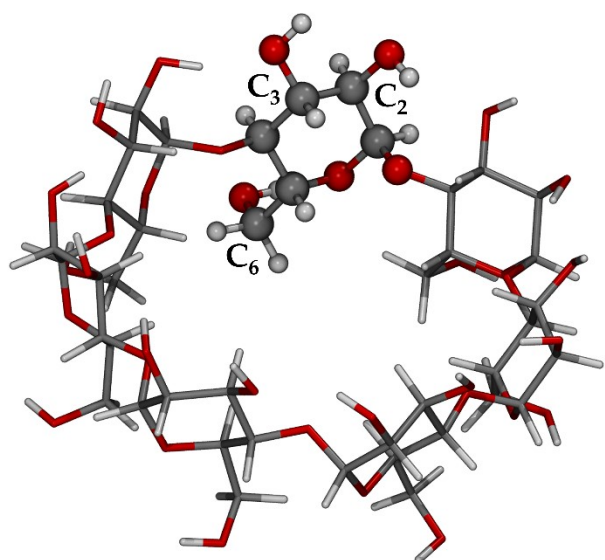

a)  $\beta$ -CD – top view

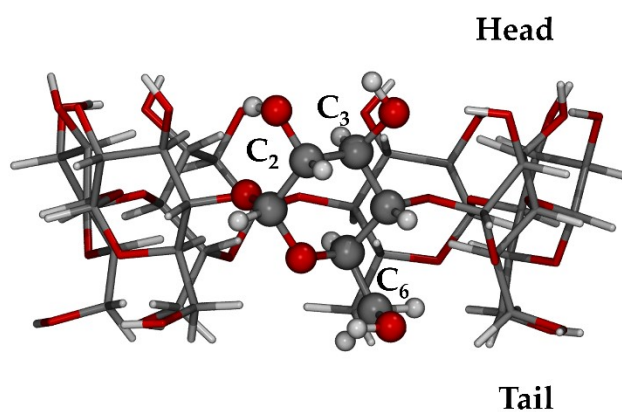

b)  $\beta$ -CD – side view

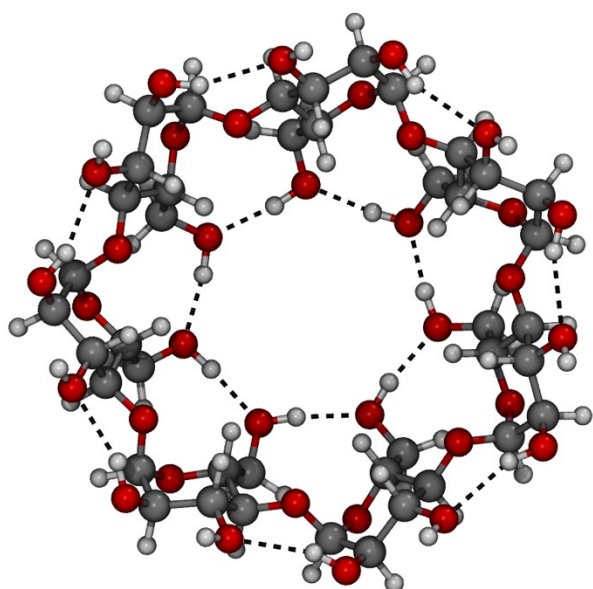

c)  $\beta$ -CD1 – top view

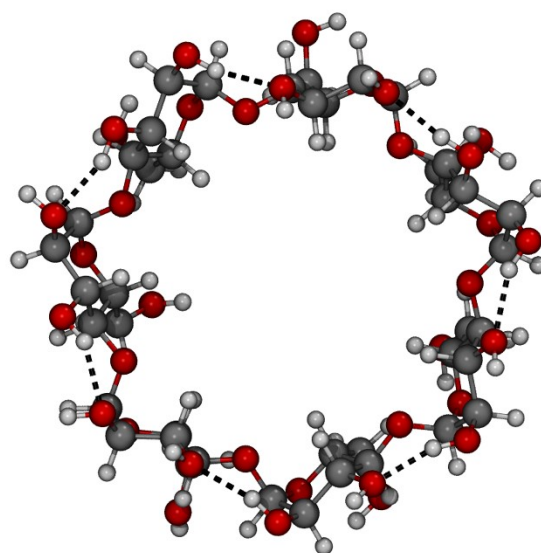

d)  $\beta$ -CD2 – top view

Figure S1: Top and side views of  $\beta$ -cyclodextrin (a, b) and open and closed conformations (c, d).

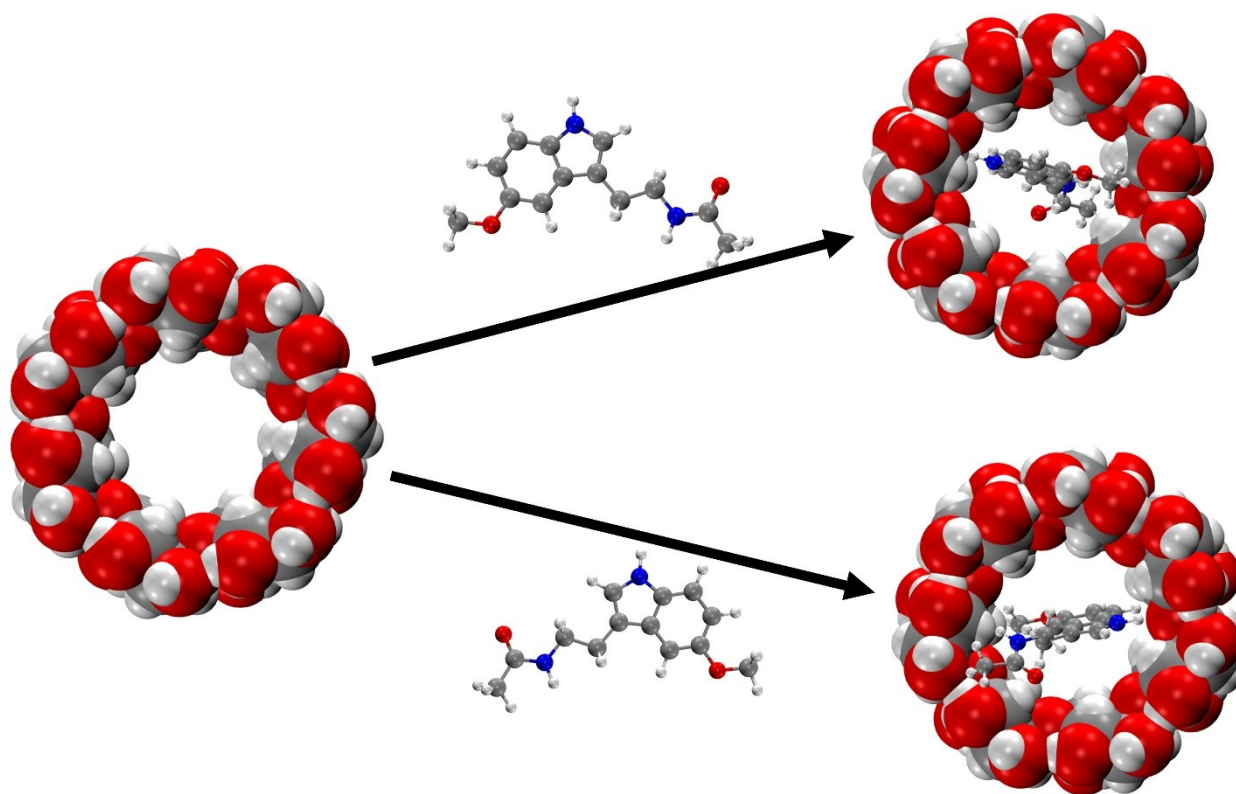

Figure S2: Starting complexes for the conformational search procedure. C in grey, N in blue, O in red, H in white.

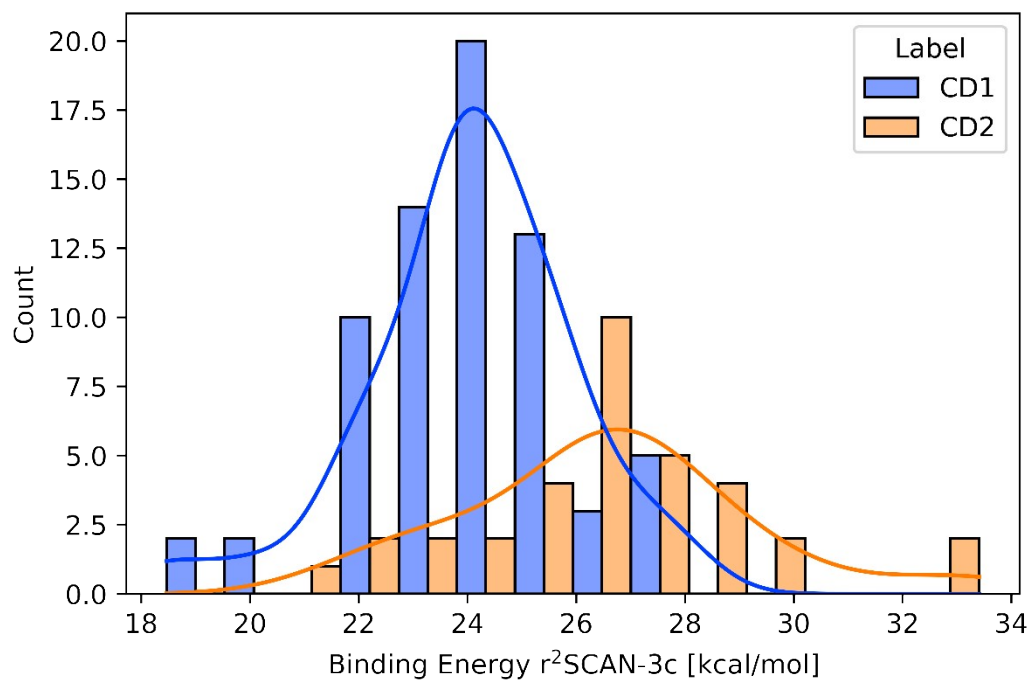

Figure S3:  $r^2$ SCAN-3c binding energy (kcal/mol) distribution of MT/ $\beta$ -CD complex in gas phase, in which the contributions given by CD1 and CD2 are separated.

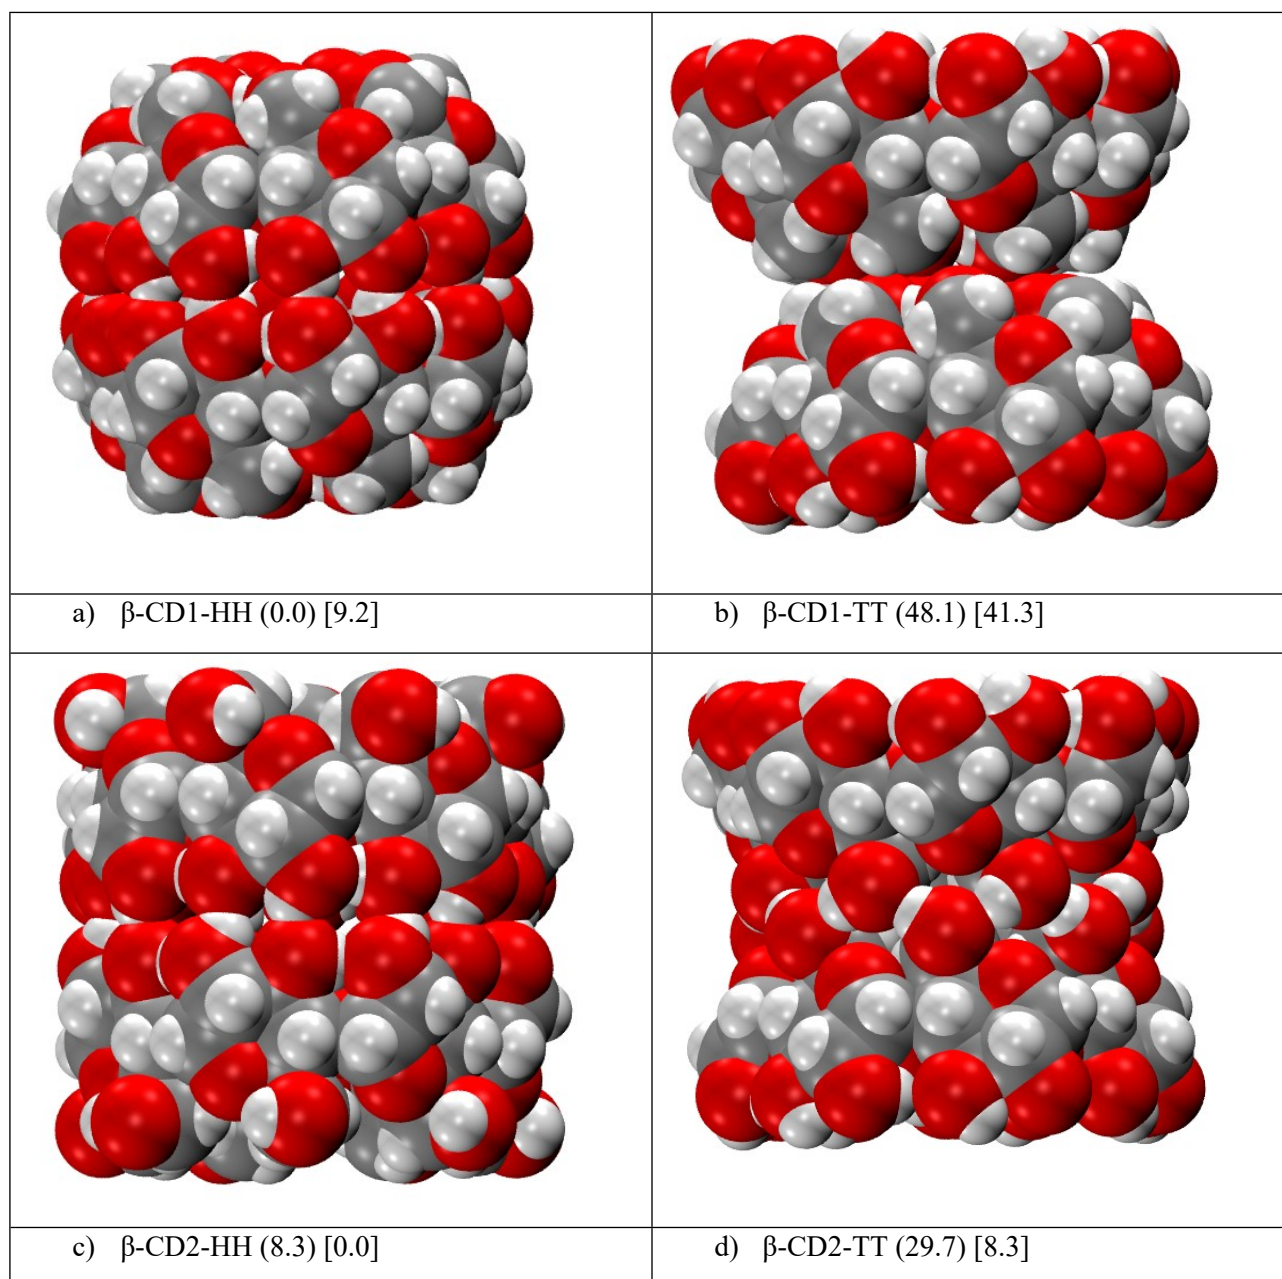

Figure S4: r<sup>2</sup>SCAN-3c optimized structures of the  $\beta$ -CD dimers in the gas phase. Numbers in round parenthesis correspond to the relative energy in the gas phase, in square parenthesis to the relative energy in water C-PCM (in kcal/mol). H and T stand for Head and Tail sides. Color code: H in white, C in grey, O in red.

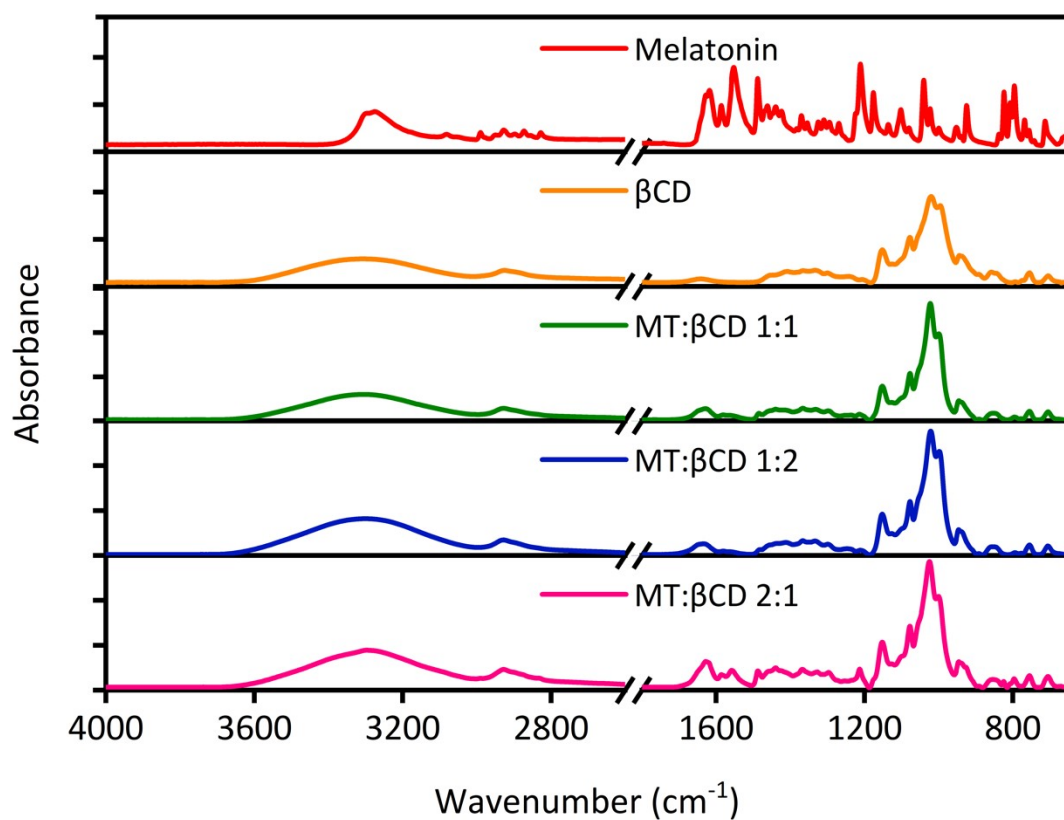

Figure S5: Experimental FTIR spectra of pure molecules (MT in red,  $\beta$ -CD in orange) and of the inclusion complexes in the three molar ratio proposed.

| Gas        |            |                        |            | Water      |            |                        |            |
|------------|------------|------------------------|------------|------------|------------|------------------------|------------|
| GFN2       |            | r <sup>2</sup> SCAN-3c |            | GFN2       |            | r <sup>2</sup> SCAN-3c |            |
| Structures | $\Delta E$ | Structures             | $\Delta E$ | Structures | $\Delta E$ | Structures             | $\Delta E$ |
| x10        | 0.00       | x00                    | 0.00       | x06        | 0.00       | x04                    | 0.00       |
| x11        | 0.00       | x01                    | 0.83       | x05        | 0.10       | x00                    | 0.34       |
| x07        | 0.01       | x03                    | 1.40       | x15        | 0.10       | x03                    | 0.65       |
| x04        | 0.06       | x02                    | 1.73       | x00        | 0.81       | x01                    | 0.68       |
| x15        | 0.07       | x04                    | 2.09       | x11        | 0.89       | x11                    | 1.06       |
| x05        | 0.08       | x15                    | 2.36       | x10        | 0.90       | x07                    | 1.07       |
| x00        | 0.12       | x05                    | 2.37       | x07        | 0.90       | x10                    | 1.08       |
| x06        | 0.17       | x10                    | 2.70       | x04        | 0.90       | x02                    | 1.27       |
| x09        | 0.65       | x11                    | 2.70       | x09        | 1.04       | x09                    | 1.72       |
| x02        | 0.93       | x07                    | 2.71       | x01        | 1.19       | x06                    | 1.77       |
| x18        | 0.98       | x09                    | 2.88       | x02        | 1.26       | x05                    | 2.38       |
| x21        | 0.98       | x06                    | 2.90       | x18        | 1.50       | x15                    | 2.40       |
| x22        | 1.01       | x18                    | 3.61       | x22        | 1.51       | x18                    | 2.57       |
| x01        | 1.15       | x21                    | 3.63       | x21        | 1.53       | x21                    | 2.61       |
| x03        | 1.53       | x22                    | 3.63       | x03        | 1.80       | x22                    | 2.63       |

Table S1: GFN2 and r<sup>2</sup>SCAN-3c energetic ranking of melatonin conformers in gas and implicit water phases.
